# Supplementary material for: Polydopamine-functionalized polymer particles as templates for mineralization of hydroxyapatite: biomimetic and in vitro bioactivity
Source: Royal Society of Chemistry journal article supplement (doi:10.1039/c5ra24821c), 2016-01-01
Supplement: c5ra24821c1.pdf [file c5ra24821c1.pdf]

## Electronic Supplementary Information

### **Polydopamine-functionalized polymer particles as templates for mineralization of hydroxyapatite: Biomimetic and *in vitro* bioactivity**

Junli Cui, †<sup>a</sup> Chao Ma, †<sup>b</sup> Zhenni Li,<sup>a</sup> Longyun Wu,<sup>b</sup> Wei Wei,<sup>c</sup> Min Chen,<sup>\*b</sup> Bo Peng,<sup>\*d</sup> and  
Ziwei Deng<sup>\*a</sup>

<sup>a</sup> School of Materials Science and Engineering, Shaanxi Normal University, Xi'an, 710062, China

<sup>b</sup> The Affiliated Drum Tower Hospital of Nanjing University Medical School, Nanjing, 210008, China

<sup>c</sup> Department of Gastrointestinal Surgery, The Second Affiliated Hospital of Nanjing Medical University, Nanjing, 210011, China

<sup>d</sup> Department of Chemistry, Physical and Theoretical Chemistry Laboratory, University of Oxford, South Parks Road, Oxford OX1 3QZ, United Kingdom

† These two authors contributed equally to this work.

Corresponding authors:

\* Dr. Min Chen, E-mail: croweminchan@aliyun.com

\* Dr. Bo Peng, Tel: +44-1865285417. E-mail: pengbo006@gmail.com

\* Dr. Ziwei Deng, Tel: +86-29-81530804. Fax: +86-29-81530702. E-mail: zwdeng@snnu.edu.cn

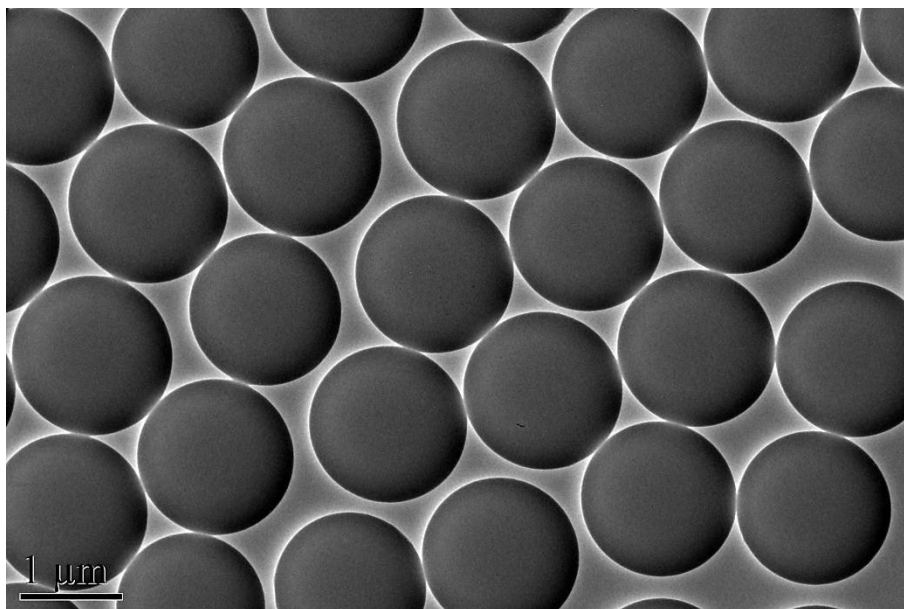

**Fig. S1**TEM image of PS particles after incubation in SBF solution for 3 days.

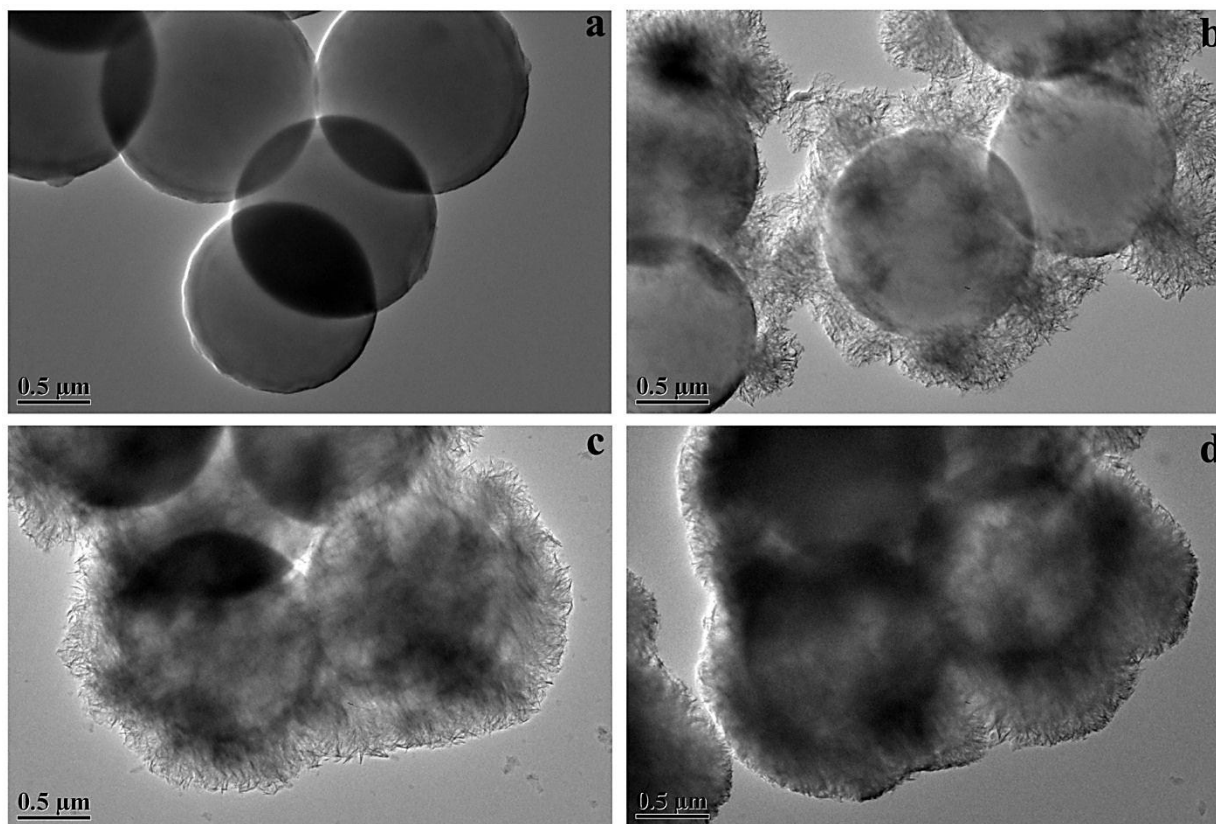

**Fig.S2** TEM images of PS/PDA composite particles (a) and the produced PS/PDA/HAP hybrid materials after incubation of PS/PDA composite particles in SBF solution for (b) 3; (c) 7; and (d) 10 days at a high magnification, respectively.

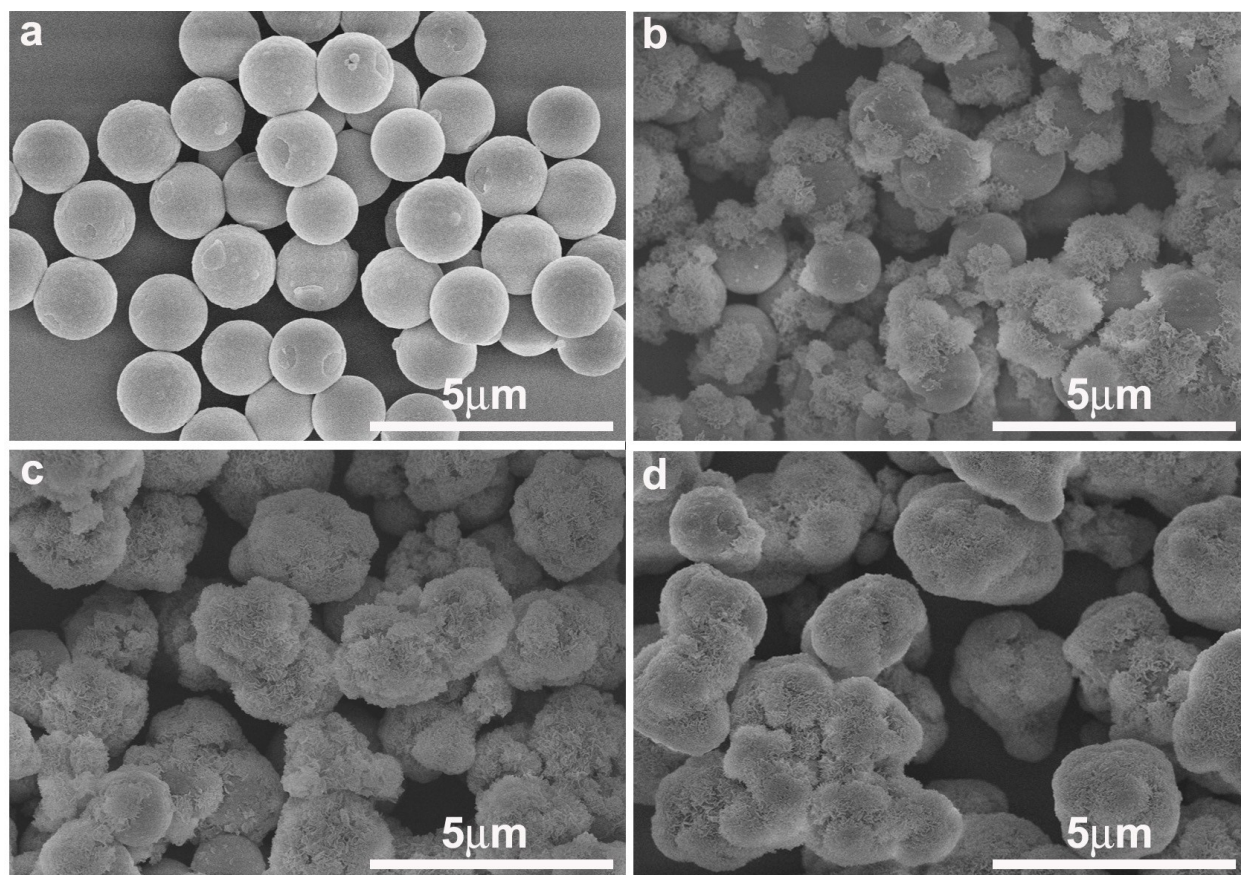

**Fig.S3** Scanning electron microscopy (SEM) images of PS/PDA composite particles (a) and the resulting PS/PDA/HAP hybrid biocomposites after the incubation of PS/PDA composite particles in the SBF solutions for (b) 3; (c) 7; and (d) 10 days, respectively.

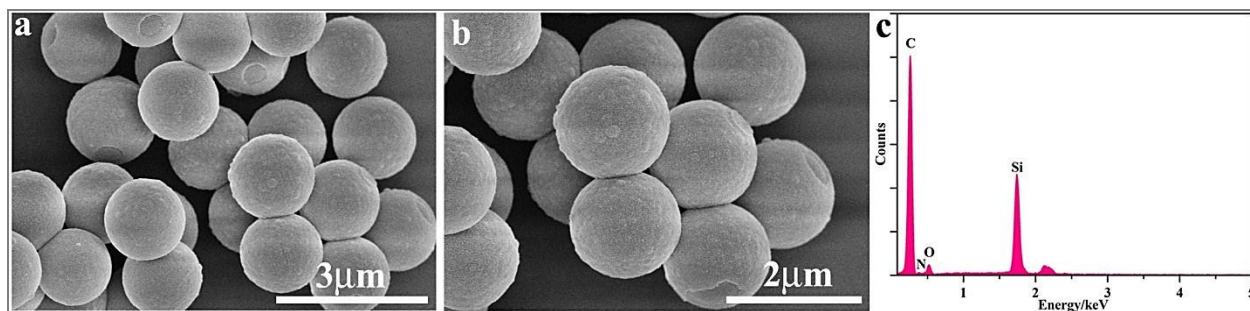

**Fig.S4** Scanning electron microscopy (SEM) images (a, b) and their corresponding energy dispersive X-ray (EDX) spectra (c) of PS/PDA composite particles. SEM images in (b) show the typical PS/PDA composite particles from (a) at a high magnification.
